# Supplementary material for: Association of Sequence types, Antimicrobial Resistance and Virulence Genes in India isolates of Klebsiella pneumoniae: A Comparative Genomics Study
Source: Research Square preprint supplement (doi:10.21203/rs.3.rs-923160/v1), 2021-09-21
Supplement: Supplementary file 1 [file 3587ad813ec74e936f26e11e.xlsx]

## Sheet: Sheet1
Strain	Completion Date	BioProject Accession	BioSample Accession	GenBank Accessions	Sequencing Centers	Sequencing Platform	Sequencing Depth	Assembly Method	Plasmids	Contigs	Genome Length	GC Content	RefSeq CDS	Isolation Source	Collection Date	Isolation Country	Geographic Location	Host Name	Host Health	Additional Metadata	Genome Quality
EGD-HP19	2013-08-07T00:00:00Z	PRJNA211612	SAMN02570520	AUTW00000000	National Environmental Engineering Research Institute-CSIR	Illumina MiSeq	73.0x	CLC NGS Cell v. 01/07/2013		904	6080708	56.8	6063	nitro-aromatics containing industrial waste water	2010	India	India				Good
KBG6.2	2020-05-11T00:00:00Z	PRJNA594627	SAMN13523692	WSLL01000000	KIIT University, School of Biotechnology, EBL Lab	Illumina HiSeq	606.0x	Unicycler v. 0.4.8		54	5038127	57.7272	4746	agricultural field soil	1905-07-10	India	India: Konark, Odisha			sample_type:Soil;collected_by:Berhanu Girma;identified_by:Berhanu Girma	Good
VBA6949	2017-09-08T00:00:00Z	PRJNA340354	SAMN07550949	NRSU00000000	Christian Medical College	Ion torrent	25.5x	SPAdes v. 5.0	6	613	5636477	57.04	5928	blood	2017	India	India	Human, Homo sapiens	Bacterimia	collected_by:Christian Medical College	Good
BA2817	2017-09-13T00:00:00Z	PRJNA400683	SAMN07572764	NTHS00000000	Christian Medical College	Ion torrent	72.9x	SPAdes v. 5.0	2	118	5598484	56.95	5619	blood	2016	India	India	Human, Homo sapiens	Bacteremia	collected_by:Christian Medical College	Good
C1	2017-09-26T00:00:00Z	PRJNA408064	SAMN07682413	NWUP01000000	Christian Medical College	IonTorrent	125.3x	SPAdes v. 5.0	5	115	5518926	57.08	5547	blood	2017	India	India	Human, Homo sapiens	bacteremia	collected_by:Apollo Hospital, Chennai, India	Good
C7	2017-09-30T00:00:00Z	PRJNA408064	SAMN07689060	NXDT01000000	Christian Medical College	IonTorrent	65.8x	SPAdes v. 5.0	3	177	5687667	56.98	5773	blood	2017	India	India	Human, Homo sapiens	Bacteremia	collected_by:Apollo Hospital, Chennai, India	Good
C4	2017-09-30T00:00:00Z	PRJNA408064	SAMN07688956	NXDQ01000000	Christian Medical College	IonTorrent	68.8x	SPAdes v. 5.0	5	148	5522573	57.09	5570	blood	2017	India	India	Human, Homo sapiens	bacteremia	collected_by:Apollo Hospital, Chennai, India	Good
C8	2017-09-30T00:00:00Z	PRJNA408064	SAMN07689079	NXDU01000000	Christian Medical College	IonTorrent	45.38x	SPAdes v. 5.0	5	170	5527041	57.08	5571	blood	2017	India	India	Human, Homo sapiens	Bacteremia	collected_by:Apollo Hospital, Chennai, India	Good
C6	2017-09-30T00:00:00Z	PRJNA408064	SAMN07689048	NXDS01000000	Christian Medical College	IonTorrent	79.3x	SPAdes v. 5.0	5	114	5518071	57.08	5536	blood	2017	India	India	Human, Homo sapiens	Bacteremia	collected_by:Apollo Hospital, Chennai, India	Good
C12	2017-10-01T00:00:00Z	PRJNA408064	SAMN07690433	NXFJ01000000	Christian Medical College	IonTorrent	52.69x	SPAdes v. 5.0	2	202	5621360	57.02	5724	blood	2017	India	India	Human, Homo sapiens	Bacteremia	collected_by:Apollo Hospital, Chennai, India	Good
KpIMS38	2017-10-12T00:00:00Z	PRJNA388135	SAMN07167860	NQMT01000000	National Institute of Science Education and Research	IonTorrent	104.35x	SPAdes v. 3.1.0	16	185	5255239	57.22	5291	Pus	1905-07-05	India	India:Bhubaneswar	Human, Homo sapiens	Implant, Artificial	collected_by:IMS, Bhubaneswar	Good
VBA3720	2017-10-26T00:00:00Z	PRJNA400267	SAMN07562412	NSCV01000000	Christian Medical College	Ion torrent	75.0x	SPAdes v. 5.0	7	282	5579469	57.02	5629	blood	2017	India	India	Human, Homo sapiens	Bacterimia	collected_by:Christian Medical College	Good
VB1347	2017-10-31T00:00:00Z	PRJNA400563	SAMN07570316	NSEC01000000	Christian Medical College	Ion torrent	40.5x	SPAdes v. 5.0	2	257	5438038	57.37	5411	blood	2015	India	India	Human, Homo sapiens	Bacterimia	collected_by:Christian Medical College	Good
BA33875	2017-11-01T00:00:00Z	PRJNA385255	SAMN06885836	NEWA01000000	Christian Medical College	IonTorrent	45.5x	SPAdes v. 5.0	3	554	5903610	56.56	6178	blood	2016	India	India	Human, Homo sapiens	Bacterimia	collected_by:Christian Medical College	Good
BA2908	2017-12-19T00:00:00Z	PRJNA422348	SAMN08176534	PJOP01000000	Christian Medical College	IonTorrent	38.2x	SPAdes v. 5.0	6	266	5955314	56.75	6179	blood	2017	India	India	Human, Homo sapiens	bacteremia	collected_by:Christian Medical College, Vellore, India	Good
B2481	2018-01-01T00:00:00Z	PRJNA427385	SAMN08237350	PKMV01000000	Christian Medical College	IonTorrent	40.0x	SPAdes v. 5.0		469			5845	blood	2017	India	India	Human, Homo sapiens	Bacteremia	collected_by:Department of Clinical Microbiology, CMC
BA33560	2018-01-02T00:00:00Z	PRJNA427765	SAMN08272141	PKOM01000000	Christian Medical College	IonTorrent	21.9x	SPAdes v. 5.0		1174			6430	blood	2017	India	India	Human, Homo sapiens	Bacteremia	collected_by:Christian Medical College, India
BA1625	2018-01-02T00:00:00Z	PRJNA427761	SAMN08272084	PKOK01000000	Christian Medical College	IonTorrent	37.0x	SPAdes v. 5.0		338			5856	blood	2017	India	India	Human, Homo sapiens	bacteremia	collected_by:Christian Medical College, India
BA20567	2018-01-02T00:00:00Z	PRJNA427764	SAMN08272134	PKOL01000000	Christian Medical College	IonTorrent	44.3x	SPAdes v. 5.0		214			5681	blood	2017	India	India	Human, Homo sapiens	bacteremia	collected_by:Christian Medical College, India
KPF39	2018-01-10T00:00:00Z	PRJNA321570	SAMN04992849	LZGC01000000	CSIR-Institute of Microbial Technology	Illumina NextSeq 500	99.0x	SPAdes v. March 2016		50			5103	urine	1905-07-05	India	India	Human, Homo sapiens		sample_type:Bacterial culture;collected_by:Vijaya BS
BA34974	2018-01-31T00:00:00Z	PRJNA427764	SAMN08388776	PPXT01000000	Christian Medical College	IonTorrent	37.4x	SPAdes v. 5.0	2	275	5523122	57.0135	5630	blood	2017	India	India	Human, Homo sapiens	Bacteremia	collected_by:Christian Medical College, Vellore, India	Good
BA28434	2018-01-31T00:00:00Z	PRJNA427764	SAMN08389138	PPXU01000000	Christian Medical College	IonTorrent	75.0x	SPAdes v. 5.0	5	168	5584936	57.0553	5676	blood	2017	India	India	Human, Homo sapiens	Bacteremia	collected_by:Christian Medical College, Vellore, India	Good
BA38014	2018-01-31T00:00:00Z	PRJNA427764	SAMN08389140	PPXV01000000	Christian Medical College	IonTorrent	41.4x	SPAdes v. 5.0	3	258	5444583	57.2026	5509	blood	2017	India	India	Human, Homo sapiens	Bacteremia	collected_by:Christian Medical College, Vellore, India	Good
BA29256	2018-01-31T00:00:00Z	PRJNA427764	SAMN08389658	PPXS01000000	Christian Medical College	IonTorrent	108.7x	SPAdes v. 5.0	2	151	5516832	57.175	5577	blood	2017	India	India	Human, Homo sapiens	bacteremia	collected_by:Christian Medical College, Vellore, India	Good
BA2275	2018-03-03T00:00:00Z	PRJNA400267	SAMN08605586	PUIH01000000	Christian Medical College	IonTorrent	36.6x	SPAdes v. 5.0	3	303	5828468	57.0062	6069	blood	2018	India	India	Human, Homo sapiens	Bacteremia	collected_by:Christian Medical College, Vellore	Good
BP737	2018-03-03T00:00:00Z	PRJNA400267	SAMN08605584	PUIG01000000	Christian Medical College	IonTorrent	191.0x	SPAdes v. 5.0	4	155	5461598	57.1658	5481	blood	2018	India	India	Human, Homo sapiens	Bacteremia	collected_by:Christian Medical College, Vellore	Good
B32205	2018-03-05T00:00:00Z	PRJNA436048	SAMN08612378	PUXA01000000	Christian Medical College	IonTorrent	51.9x	SPAdes v. 5.0	4	273	5677516	57.0739	5815	blood	2013	India	India	Human, Homo sapiens	Bacteremia	collected_by:Christian Medical College, Vellore	Good
B35725	2018-03-05T00:00:00Z	PRJNA436048	SAMN08612379	PUXB01000000	Christian Medical College	IonTorrent	43.0x	SPAdes v. 5.0	4	256	5649899	57.0651	5786	blood	2013	India	India	Human, Homo sapiens	Bacteremia	collected_by:Christian Medical College, Vellore	Good
PM12640	2018-03-17T00:00:00Z	PRJNA436652	SAMN08629901	PWAF01000000	Christian Medical College	IonTorrent	17.5x	SPAdes v. 5.0	4	738	5770388	56.7967	6149	cerebrospinal fluid	2017	India	India	Human, Homo sapiens	CNS infection	collected_by:AIIMS, NEW DELHI	Good
PM12530	2018-03-17T00:00:00Z	PRJNA436652	SAMN08629897	PWAE01000000	Christian Medical College	IonTorrent	15.5x	SPAdes v. 5.0	7	633	5569811	56.9816	5937	blood	2017	India	India	Human, Homo sapiens	Bacteremia	collected_by:All India Institute for Medical Sciences, New Delhi	Good
PMM475	2018-03-17T00:00:00Z	PRJNA436652	SAMN08629892	PWAD01000000	Christian Medical College	IonTorrent	44.9x	SPAdes v. 5.0	4	251	5708938	56.8624	5847	Endotracheal Aspirate	2017	India	India	Human, Homo sapiens	respiratory infection	collected_by:All India Institute of Medical Sciences, New Delhi	Good
PM7109	2018-03-17T00:00:00Z	PRJNA436652	SAMN08630015	PWAG01000000	Christian Medical College	IonTorrent	15.6x	SPAdes v. 5.0	6	732	5594031	56.862	6108	blood	2017	India	India	Human, Homo sapiens	Bacteremia	collected_by:AIIMS, NEW DELHI	Good
PM5070	2018-04-09T00:00:00Z	PRJNA436652	SAMN08802958	PZPS01000000	Christian Medical College	IonTorrent	30.5x	SPAdes v. 5.0	5	295	5726665	56.9285	5895	tracheal aspirate	2018	India	India	Human, Homo sapiens	respiratory tract infection	collected_by:AIIMS, NEW DELHI	Good
PM10818	2018-04-09T00:00:00Z	PRJNA436652	SAMN08802956	PZPR01000000	Christian Medical College	IonTorrent	25.0x	SPAdes v. 5.0	3	294	5552483	57.3143	5712	cerebrospinal fluid	2018	India	India	Human, Homo sapiens	CNS infection	collected_by:AIIMS, NEW DELHI	Good
PM9016	2018-04-01T00:00:00Z	PRJNA436652	SAMN08798892	PYUM01000000	Christian Medical College	IonTorrent	82.0x	SPAdes v. 5.0	7	180	5580466	56.9894	5660	urine	2018	India	India	Human, Homo sapiens	Urinary tract infection	collected_by:AIIMS, NEW DELHI	Good
PM11304	2018-04-01T00:00:00Z	PRJNA436652	SAMN08798890	PYUL01000000	Christian Medical College	IonTorrent	39.0x	SPAdes v. 5.0	4	401	5700933	56.8191	5965	blood	2017	India	India	Human, Homo sapiens	Bacteremia	collected_by:AIIMS, NEW DELHI	Good
VBA2612	2018-04-01T00:00:00Z	PRJNA400267	SAMN08793705	PYSL01000000	Christian Medical College	IonTorrent	81.0x	SPAdes v. 5.0	7	234	5557127	56.9496	5653	blood	2018	India	India	Human, Homo sapiens	Bacteremia	collected_by:Christian Medical College, Vellore, India	Good
VBP1492	2018-04-01T00:00:00Z	PRJNA400267	SAMN08793870	PYSM01000000	Christian Medical College	IonTorrent	86.0x	SPAdes v. 5.0	6	188	5542914	56.9716	5648	blood	2018	India	India	Human, Homo sapiens	Bacteremia	collected_by:Christian Medical College, Vellore, India	Good
HPCN5	2018-05-25T00:00:00Z	PRJNA472010	SAMN09223500	QGHI01000000	CSIR- National Environmental Engineering Research Institute	Illumina NextSeq 500	20.0x	SPAdes v. 3.9.0		477	5320309	57.1548		Domestic sewage	2016	India	India: Nagpur			sample_type:Whole organism	Good
HPCN17	2018-05-28T00:00:00Z	PRJNA472004	SAMN09223351	QGNV01000000	CSIR- National Environmental Engineering Research Institute	Illumina NextSeq 500	20.0x	SPAdes v. 3.9.0		848	5452171	57.3821	5882	Domestic sewage	2016	India	India: Nagpur			sample_type:Whole organism	Good
HPCN22	2018-07-09T00:00:00Z	PRJNA478838	SAMN09532160	QNQQ01000000	CSIR- National Environmental Engineering Research Institute	Illumina NextSeq 500	20.0x	SPAdes v. 3.9.0		17	4639759	57.8413	4519	root nodules and soil	2016	India	India: Nagpur			sample_type:Whole organism	Good
938	2018-07-10T00:00:00Z	PRJNA445372	SAMN08782032	PYWE01000000	National Institute of Cholera and Enteric Diseases	Illumina MiSeq	76.03x	SPAdes v. 3.9.0		142	5829841	56.936	5890	blood sample from septicemic neonates	1905-07-07	India	India: Kolkata	Human, Homo sapiens	Pneumonia	collected_by:Sharmi Naha	Good
876	2018-07-10T00:00:00Z	PRJNA445372	SAMN08782029	PYWD01000000	National Institute of Cholera and Enteric Diseases	Illumina MiSeq	77.16x	SPAdes v. 3.9.0		223	5766088	57.0458	5880	blood sample from septicemic neonates	2015-10-22	India	India: Kolkata	Human, Homo sapiens	Pneumonia	collected_by:Sharmi Naha	Good
936	2018-07-11T00:00:00Z	PRJNA445372	SAMN08782031	QCZC01000000	National Institute of Cholera and Enteric Diseases	Illumina MiSeq	76.16x	SPAdes v. 3.9.0		160	5827988	56.9235	5895	Blood sample from neonates	2015-12-12	India	India: Kolkata	Human, Homo sapiens	Pneumonia	collected_by:Sharmi Naha	Good
926	2018-07-11T00:00:00Z	PRJNA445372	SAMN08782030	QCZB01000000	National Institute of Cholera and Enteric Diseases	Illumina MiSeq	75.68x	SPAdes v. 3.9.0		135	5864349	56.9001	5940	Blood sample from neonates	2015-11-20	India	India: Kolkata	Human, Homo sapiens	Pneumonia	collected_by:Sharmi Naha	Good
U25	2015-12-09T00:00:00Z	PRJNA288422	SAMN03780451	CP012043	DR MGR Educational and Research Institute	PacBio	25.0x	HGAP v. MAY-2015		1	5491870	57.38	5228	urine	1905-07-02	India	India: Chennai	Human, Homo sapiens	UTI	collected_by:H. Magesh	Good
JNM10C3	2018-08-09T00:00:00Z	PRJNA479760	SAMN09604068	CP030877,CP030876,CP030878	National Institute of Biomedical Genomics	Illumina HiSeq	112.0x	Velvet v. 1.2.10; Bowtie v. 2	2	3	5605361	57.1146	5421	Nasal swab	2017	India	India: West Bengal	Human, Homo sapiens	Respiratory distress	collected_by:College of Medicine & Jawaharlal Nehru Memorial Hospital, Kalyani, West Bengal, India	Good
KP26	2018-10-25T00:00:00Z	PRJNA497313	SAMN10255171	REFT01000000	Federation University Australia	Illumina HiSeq	30.0x	SPAdes v. 3.7		95	5574028	56.9628	5580	urine	2018-06-01	India	India: Kolkata	Human, Homo sapiens	Urinary Tract Infection	collected_by:Anuradha Agarwal	Good
BA41763	2016-09-08T00:00:00Z	PRJNA324533	SAMN05207686	LZYN01000000	Christian Medical College	Ion torrent	25.9x	SPAdes v. 5.0	7	320	5917065	56.5734	5841	blood	2015	India	India	Human, Homo sapiens	Bacterimia	collected_by:Christian Medical College	Good
B7868	2016-09-08T00:00:00Z	PRJNA324523	SAMN05207300	LYYE01000000	Christian Medical College	Ion torrent	28.0x	SPAdes v. 5.0		565	5452890	57.2653	5458	blood	2015	India	India	Human, Homo sapiens	Bacterimia	collected_by:Christian Medical College	Good
BA253	2016-09-08T00:00:00Z	PRJNA325704	SAMN05250855	LZYA01000000	Christian Medical College	Ion torrent	67.58x	SPAdes v. 5.0	1	96	5408388	57.4117	5263	blood	2016	India	India	Human, Homo sapiens	Bacterimia	collected_by:Christian Medical College	Good
CMC_VB6753	2016-09-23T00:00:00Z	PRJNA340226	SAMN05710263	MEBR01000000	Christian Medical College	IonTorrent	53.62x	SPAdes v. 5.0.0.0	4	170	5753090	56.761	5612	blood	2015	India	India	Human, Homo sapiens	Bacteremia	collected_by:Christian Medical College	Good
B3789	2016-10-11T00:00:00Z	PRJNA329475	SAMN05413133	MBFY01000000	Christian Medical College	Ion torrent	43.88x	SPAdes v. 5.0	3	187	5800125	57.0071	5694	blood	2015	India	India	Human, Homo sapiens	Bacterimia	collected_by:Christian Medical College	Good
B1647	2016-10-12T00:00:00Z	PRJNA335526	SAMN05447356	MCFO01000000	Christian Medical College	Ion torrent	47.0x	SPAdes v. 5.0	5	171	5611600	57.0243	5510	blood	2015	India	India	Human, Homo sapiens	Bacterimia	collected_by:Christian Medical College	Good
B20038	2016-10-12T00:00:00Z	PRJNA335528	SAMN05447360	MCFP01000000	Christian Medical College	Ion torrent	42.99x	SPAdes v. 5.0	5	263	5726343	56.8506	5674	blood	2015	India	India	Human, Homo sapiens	Bacterimia	collected_by:Christian Medical College	Good
B20143	2016-10-12T00:00:00Z	PRJNA335529	SAMN05447361	MCFQ01000000	Christian Medical College	Ion torrent	41.96x	SPAdes v. 5.0	4	226	5693732	56.96	5676	blood	2014	India	India	Human, Homo sapiens	Bacterimia	collected_by:Christian Medical College	Good
B3639	2016-10-17T00:00:00Z	PRJNA329474	SAMN05413132	MBQC01000000	Christian Medical College	Ion torrent	87.6x	SPAdes v. 5.0	1	143	5576376	57.2202	5432	blood	2015	India	India	Human, Homo sapiens	Bacterimia	collected_by:Christian Medical College	Good
CMC_VB4175	2016-11-07T00:00:00Z	PRJNA340354	SAMN05712736	MDZG01000000	Christian Medical College	Ion torrent	37.57x	SPAdes v. 5.0	5	141	5569604	57.0164	5448	blood	2014	India	India	Human, Homo sapiens	Bacterimia	collected_by:Christian Medical College	Good
CMC_VB35168	2016-11-10T00:00:00Z	PRJNA342013	SAMN05732389	MOXL01000000	Christian Medical College	IonTorrent	75.77x	SPAdes v. 5.0.0.0	5	99	5513269	57.129	5379	blood	2013	India	India	Human, Homo sapiens	Bacteremia	collected_by:Department of Clinical Microbiology, Christian Medical College	Good
CMC_VB13923	2016-11-10T00:00:00Z	PRJNA342016	SAMN05732391	MOXM01000000	Christian Medical College	IonTorrent	24.97x	SPAdes v. 5.0.0.0	4	207	5704118	56.789	5546	blood	2014	India	India	Human, Homo sapiens	Bacteremia	collected_by:Department of Clinical Microbiology, Christian Medical College	Good
CMC_VB5505	2016-11-10T00:00:00Z	PRJNA342019	SAMN05732395	MOXN01000000	Christian Medical College	IonTorrent	39.8x	SPAdes v. 5.0.0.0	6	124	5558808	57.0256	5429	blood	2014	India	India	Human, Homo sapiens	Bacteremia	collected_by:Department of Clinical Microbiology, Christian Medical College	Good
27CAM	2019-02-06T00:00:00Z	PRJNA517998	SAMN10849754	SEHN01000000	Christian Medical College	IonTorrent	63.0x	SPAdes v. 5.0	7	262	5543683	57.0855	5664	Endotracheal aspirate	2017	India	India	Human, Homo sapiens	respiratory infection	collected_by:P.D. Hinduja hospital	Good
231CHI	2019-02-06T00:00:00Z	PRJNA518002	SAMN10849896	SEHR01000000	Christian Medical College	IonTorrent	54.0x	SPAdes v. 5.0	6	196	5586619	57.0563	5653	sputum	2017	India	India	Human, Homo sapiens	Respiratory infection	collected_by:Choitram Hospital and Research Center, India	Good
86AS	2019-02-06T00:00:00Z	PRJNA518007	SAMN10849998	SEHU01000000	Christian Medical College	IonTorrent	59.0x	SPAdes v. 5.0	5	187	5617489	56.9967	5670	sputum	2017	India	India	Human, Homo sapiens	Respiratory infection	collected_by:Fortis Hospital, Mohali, India	Good
55DN	2019-02-06T00:00:00Z	PRJNA518001	SAMN10849882	SEHQ01000000	Christian Medical College	IonTorrent	58.0x	SPAdes v. 5.0	5	124	5511610	57.1229	5540	bronchoalveolar lavage	2017	India	India	Human, Homo sapiens	Respiratory infection	collected_by:Woodlands Hospital, Kolkata	Good
8AS	2019-02-06T00:00:00Z	PRJNA518007	SAMN10849984	SEHT01000000	Christian Medical College	IonTorrent	56.0x	SPAdes v. 5.0	5	160	5544575	57.0476	5554	endotracheal aspirate	2017	India	India	Human, Homo sapiens	respiratory infection	collected_by:Fortis Hospital, Mohali, India	Good
76CHI	2019-02-06T00:00:00Z	PRJNA518002	SAMN10849983	SEHS01000000	Christian Medical College	IonTorrent	72.0x	SPAdes v. 5.0	3	146	5532560	57.0694	5570	urine	2017	India	India	Human, Homo sapiens	Urinary tract infection	collected_by:Choitram Hospital and Research Center, India	Good
61CAM	2019-02-06T00:00:00Z	PRJNA517998	SAMN10849755	SEHO01000000	Christian Medical College	IonTorrent	58.0x	SPAdes v. 5.0	7	279	5557822	57.0918	5667	sputum	2017	India	India	Human, Homo sapiens	Respiratory infection	collected_by:P.D. Hinduja Hospital	Good
4DN	2019-02-06T00:00:00Z	PRJNA518001	SAMN10849880	SEHP01000000	Christian Medical College	IonTorrent	52.0x	SPAdes v. 5.0	6	146	5547817	57.0706	5568	Endotracheal aspirate	2017	India	India	Human, Homo sapiens	Respiratory specimen	collected_by:Woodlands Hospital, Kolkata	Good
BA4656	2019-02-19T00:00:00Z	PRJNA521675	SAMN10908921	CP035905,CP035912,CP035911,CP035908,CP035907,CP035910,CP035906,CP035909	Christian Medical College	IonTorrent; Oxford Nanopore MiniION	58.0x	Canu v. 1.7; Unicycler hybrid v. 0.4.6	7	8	6138784	56.6939	6129	blood	2018	India	India	Human, Homo sapiens	Bacteremia	collected_by:Christian Medical College, Vellore, India	Good
35DN	2019-02-17T00:00:00Z	PRJNA518001	SAMN10907940	SGIY01000000	Christian Medical College	IonTorrent	55.0x	SPAdes v. 5.0	7	134	5690141	56.933	5704	sputum	2017	India	India	Human, Homo sapiens	Respiratory tract infection	collected_by:Woodlands Hospital, Kolkata	Good
242CHI	2019-02-17T00:00:00Z	PRJNA518002	SAMN10908492	SGIZ01000000	Christian Medical College	IonTorrent	60.0x	SPAdes v. 5.0	7	132	5407837	57.1999	5421	bronchoalveolar lavage	2017	India	India	Human, Homo sapiens	respiratory tract infection	collected_by:Choitram Hospital and Research Centre, Indore	Good
BA1559	2019-02-25T00:00:00Z	PRJNA522835	SAMN10956433	CP036187,CP036189,CP036188	Christian Medical College	IonTorrent; Oxford Nanopore MiniION	58.1x	Canu v. 1.7; Unicycler hybrid v. 0.4.6	2	3	5663110	57.0178	5550	blood	2018	India	India	Human, Homo sapiens	Bacteremia	collected_by:Christian Medical College, Vellore, India	Good
BA34918	2019-02-25T00:00:00Z	PRJNA522836	SAMN10956502	CP036190,CP036198,CP036197,CP036196,CP036192,CP036194,CP036193,CP036195,CP036191	Christian Medical College	IonTorrent; Oxford Nanopore MiniION	37.6x	Canu v. 1.7; Unicycler hybrid v. 0.4.6	8	9	6181364	56.6206	6170	blood	2017	India	India	Human, Homo sapiens	Bacteremia	collected_by:Christian Medical College, Vellore, India	Good
PL1-RCS238	2019-02-25T00:00:00Z	PRJNA505203	SAMN10411878	SAIU01000000	Banaras Hindu University	Illumina MiSeq	248.0x	Minia v. 2.0.3		321	5472625	57.2243	5455	river surface water	2018-02-15	India	India: River Ganga, Varanasi			sample_type:Pure culture isolate;collected_by:Pushpa Lata, Pooja Verma;identified_by:Pushpa Lata et al.	Good
BP327	2019-02-28T00:00:00Z	PRJNA523082	SAMN10963497	CP036335,CP036338,CP036337,CP036336	Christian Medical College	IonTorrent; Oxford Nanopore MiniION	62.3x	Canu v. 1.7; Unicycler hybrid v. 0.4.6	3	4	5881158	56.5613	5790	blood	2018	India	India	Human, Homo sapiens	Bacteremia	collected_by:Christian Medical College, Vellore, India	Good
CRKP I	2019-05-14T00:00:00Z	PRJNA525329	SAMN11047257	CP037927	RAJIV GANDHI CENTRE FOR BIOTECHNOLOGY	Illumina MiSeq	140.0x	SPAdes v. 3.0.0.		1	5318075	57.4894	5219	blood	2018-06-20	India	India	Human, Homo sapiens	bacteremia	collected_by:Sabu Thomas	Good
B-16340	2019-10-28T00:00:00Z	PRJNA579066	SAMN13091586	WHSG01000000	Sanjay Gandhi Post Graduate Institute of Medical Sciences	IonTorrent	92.98x	SPAdes v. 3.13.0		212	5787993	56.6864	5834	blood	2016-08-16	India	India: Lucknow	Human, Homo sapiens		sample_type:genomic DNA;collected_by:Sanjay Gandhi Post Graduate Institute of Medical Sciences	Good
P-7335	2019-10-28T00:00:00Z	PRJNA579067	SAMN13091613	WHSH01000000	Sanjay Gandhi Post Graduate Institute of Medical Sciences	IonTorrent	60.63x	SPAdes v. 3.13.0		346	5775494	56.4491	5931	Pus	2016-08-16	India	India: Lucknow	Human, Homo sapiens		sample_type:genomic DNA;collected_by:Sanjay Gandhi Post Graduate Institute of Medical Sciences	Good
EN5275	2019-11-22T00:00:00Z	PRJNA548120	SAMN12003074	VINI01000000	National Institute of Cholera and Enteric Diseases	Illumina NextSeq	96.0x	SPAdes v. 3.9.0		139	6030686	56.691	6005	blood sample from neonates	2016-01-03	India	India: Kolkata	Human, Homo sapiens	Pneumonia	collected_by:Subhankar Mukherjee	Good
EN5218	2019-12-18T00:00:00Z	PRJNA548120	SAMN13140066	WMCH01000000	National Institute of Cholera and Enteric Diseases	Illumina HiSeq	115.0x	Velvet v. 1.2.10		182	5661039	57.0945	5427	Blood sample from neonates	2015-07-01	India	India: Kolkata	Human, Homo sapiens	Pneumonia	collected_by:Sharmi Naha	Good
EN5153	2019-12-18T00:00:00Z	PRJNA548120	SAMN12572244	VSLB01000000	National Institute of Cholera and Enteric Diseases	Illumina MiSeq	20.0x	SPAdes v. 3.9.0		136	5532990	57.2143	5451	blood sample from neonates	2013-12	India	India: Kolkata	Human, Homo sapiens	Pneumonia	collected_by:Sharmi Naha	Good
EN5199	2019-12-18T00:00:00Z	PRJNA548120	SAMN12572245	VSLC01000000	National Institute of Cholera and Enteric Diseases	Illumina MiSeq	20.0x	SPAdes v. 3.9.0		136	5794270	57.0626	5734	blood sample from neonates	2014-11	India	India: Kolkata	Human, Homo sapiens	Pneumonia	collected_by:Sharmi Naha	Good
EN5339	2019-12-18T00:00:00Z	PRJNA548120	SAMN12572246	VSJI01000000	National Institute of Cholera and Enteric Diseases	Illumina MiSeq	20.0x	SPAdes v. 3.9.0		165	5879710	56.9558	5838	blood sample from neonates	2016-04	India	India: Kolkata	Human, Homo sapiens	Pneumonia	collected_by:Sharmi Naha	Good
80CAM	2020-02-25T00:00:00Z	PRJNA517998	SAMN10866824	JAAEYE010000126,JAAEYE010000053,JAAEYE010000039,JAAEYE010000103,JAAEYE010000072,JAAEYE010000100,JAAEYE010000101	Christian Medical College	IonTorrent	89.0x	SPAdes v. 5.0	5	226	5484665	57.1255	5512	Brochoalveolar lavage	2017	India	India	Human, Homo sapiens	Respiratory tract infection	collected_by:P.D. Hinduja Hospital	Good
162CAM	2020-02-25T00:00:00Z	PRJNA517998	SAMN10866817	JAAEYD010000076,JAAEYD010000079,JAAEYD010000054,JAAEYD010000037,JAAEYD010000085,JAAEYD010000066,JAAEYD010000100	Christian Medical College	IonTorrent	84.0x	SPAdes v. 5.0	6	157	5401021	57.2142	5411	urine	2017	India	India	Human, Homo sapiens	urinary tract infection	collected_by:P.D. Hinduja Hospital	Good
VBNK2	2020-03-03T00:00:00Z	PRJNA608299	SAMN14169900	JAALJL010000116,JAALJL010000072,JAALJL010000104,JAALJL010000096,JAALJL010000091,JAALJL010000032,JAALJL010000117	Christian Medical College	IonTorrent	68.97x	SPAdes v. 5.0.0.0		181	5681964	56.9719	5771	blood	2018	India	India: Vellore	Human, Homo sapiens	Blood stream infection	collected_by:Christian Medical College, Vellore	Good
VBNK3	2020-03-03T00:00:00Z	PRJNA608299	SAMN14169901	JAALJK010000144,JAALJK010000075,JAALJK010000044,JAALJK010000146,JAALJK010000076,JAALJK010000119,JAALJK010000066	Christian Medical College	IonTorrent	41.46x	SPAdes v. 5.0.0.0		322	5690177	56.9761	5870	blood	2018	India	India: Vellore	Human, Homo sapiens	Blood stream infection	collected_by:Christian Medical College, Vellore	Good
VBNK6	2020-03-03T00:00:00Z	PRJNA608299	SAMN14169904	JAALJJ010000010,JAALJJ010000032,JAALJJ010000096,JAALJJ010000055,JAALJJ010000112,JAALJJ010000113,JAALJJ010000114	Christian Medical College	IonTorrent	46.84x	SPAdes v. 5.0.0.0		365	5717455	56.7984	5765	blood	2018	India	India: Vellore	Human, Homo sapiens	Blood stream infection	collected_by:Christian Medical College, Vellore	Good
BA39824	2020-03-24T00:00:00Z	PRJNA613369	SAMN14402359	JAAQTI010000001,JAAQTI010000010,JAAQTI010000011,JAAQTI010000012,JAAQTI010000013,JAAQTI010000014,JAAQTI010000015	Christian Medical College	Illumina HiSeq X10	71.70682x	SPAdes v. 3.12.0		90	5478863	57.1795	5412	blood	2019	India	India	Human, Homo sapiens	Bacteremia	collected_by:Dept of Microbiology, CMC Vellore	Good
BA25665	2020-03-24T00:00:00Z	PRJNA613369	SAMN14402353	JAAQTD010000001,JAAQTD010000010,JAAQTD010000100,JAAQTD010000101,JAAQTD010000102,JAAQTD010000103,JAAQTD010000104	Christian Medical College	Illumina HiSeq X10	85.89159x	SPAdes v. 3.12.0		123	5855381	56.7184	5764	blood	2019	India	India	Human, Homo sapiens	Bacteremia	collected_by:Dept of Microbiology, CMC Vellore	Good
BA25425	2020-03-24T00:00:00Z	PRJNA613369	SAMN14402352	JAAQTC010000001,JAAQTC010000010,JAAQTC010000011,JAAQTC010000012,JAAQTC010000013,JAAQTC010000014,JAAQTC010000015	Christian Medical College	Illumina HiSeq X10	83.17912x	SPAdes v. 3.12.0		90	5652452	56.8823	5513	blood	2019	India	India	Human, Homo sapiens	Bacteremia	collected_by:Dept of Microbiology, CMC Vellore	Good
BA39950	2020-03-24T00:00:00Z	PRJNA613369	SAMN14402361	JAAQTK010000001,JAAQTK010000010,JAAQTK010000011,JAAQTK010000012,JAAQTK010000013,JAAQTK010000014,JAAQTK010000015	Christian Medical College	Illumina HiSeq X10	35.42775x	SPAdes v. 3.12.0		95	5763357	56.9782	5809	blood	2019	India	India	Human, Homo sapiens	Bacteremia	collected_by:Dept of Microbiology, CMC Vellore	Good
BA37082	2020-03-24T00:00:00Z	PRJNA613369	SAMN14402325	JAAQSE010000001,JAAQSE010000010,JAAQSE010000011,JAAQSE010000012,JAAQSE010000013,JAAQSE010000014,JAAQSE010000015	Christian Medical College	Illumina HiSeq X10	111.8781x	SPAdes v. 3.12.0		90	5652419	56.8508	5627	blood	2019	India	India	Human, Homo sapiens	Bacteremia	collected_by:Dept of Microbiology, CMC Vellore	Good
BA10334	2020-03-24T00:00:00Z	PRJNA613369	SAMN14402342	JAAQSS010000001,JAAQSS010000010,JAAQSS010000011,JAAQSS010000012,JAAQSS010000013,JAAQSS010000014,JAAQSS010000015	Christian Medical College	Illumina HiSeq X10	70.13016x	SPAdes v. 3.12.0		99	5722973	56.8077	5593	blood	2019	India	India	Human, Homo sapiens	Bacteremia	collected_by:Dept of Microbiology, CMC Vellore	Good
BA36541	2020-03-24T00:00:00Z	PRJNA613369	SAMN14402326	JAAQSF010000001,JAAQSF010000010,JAAQSF010000011,JAAQSF010000012,JAAQSF010000013,JAAQSF010000014,JAAQSF010000015	Christian Medical College	Illumina HiSeq X10	88.89933x	SPAdes v. 3.12.0		60	5351579	57.4679	5293	blood	2019	India	India	Human, Homo sapiens	Bacteremia	collected_by:Dept of Microbiology, CMC Vellore	Good
BA37787	2020-03-24T00:00:00Z	PRJNA613369	SAMN14402324	JAAQSD010000001,JAAQSD010000010,JAAQSD010000100,JAAQSD010000101,JAAQSD010000102,JAAQSD010000103,JAAQSD010000104	Christian Medical College	Illumina HiSeq X10	85.59364x	SPAdes v. 3.12.0		136	5759858	57.0257	5828	blood	2019	India	India	Human, Homo sapiens	Bacteremia	collected_by:Dept of Microbiology, CMC Vellore	Good
BA39649	2020-03-24T00:00:00Z	PRJNA613369	SAMN14402321	JAAQSA010000001,JAAQSA010000010,JAAQSA010000100,JAAQSA010000101,JAAQSA010000102,JAAQSA010000103,JAAQSA010000104	Christian Medical College	Illumina HiSeq X10	78.455x	SPAdes v. 3.12.0		132	5759896	57.0238	5829	blood	2019	India	India	Human, Homo sapiens	Bacteremia	collected_by:Dept of Microbiology, CMC Vellore	Good
BA4439	2020-03-24T00:00:00Z	PRJNA613369	SAMN14402346	JAAQSW010000001,JAAQSW010000010,JAAQSW010000100,JAAQSW010000101,JAAQSW010000102,JAAQSW010000103,JAAQSW010000104	Christian Medical College	Illumina HiSeq X10	93.87967x	SPAdes v. 3.12.0		124	5497083	57.2658	5397	blood	2019	India	India	Human, Homo sapiens	Bacteremia	collected_by:Dept of Microbiology, CMC Vellore	Good
BA39576	2020-03-24T00:00:00Z	PRJNA613369	SAMN14402322	JAAQSB010000001,JAAQSB010000010,JAAQSB010000100,JAAQSB010000101,JAAQSB010000102,JAAQSB010000103,JAAQSB010000011	Christian Medical College	Illumina HiSeq X10	63.76606x	SPAdes v. 3.12.0		103	5750063	57.0316	5806	blood	2019	India	India	Human, Homo sapiens	Bacteremia	collected_by:Dept of Microbiology, CMC Vellore	Good
BA20978	2020-03-24T00:00:00Z	PRJNA613369	SAMN14402349	JAAQSZ010000001,JAAQSZ010000010,JAAQSZ010000100,JAAQSZ010000101,JAAQSZ010000102,JAAQSZ010000103,JAAQSZ010000104	Christian Medical College	Illumina HiSeq X10	91.37385x	SPAdes v. 3.12.0		121	5852144	56.7156	5757	blood	2019	India	India	Human, Homo sapiens	Bacteremia	collected_by:Dept of Microbiology, CMC Vellore	Good
BP19430	2020-03-24T00:00:00Z	PRJNA613369	SAMN14402323	JAAQSC010000001,JAAQSC010000010,JAAQSC010000011,JAAQSC010000012,JAAQSC010000013,JAAQSC010000014,JAAQSC010000015	Christian Medical College	Illumina HiSeq X10	67.40975x	SPAdes v. 3.12.0		43	5438094	57.3886	5287	blood	2019	India	India	Human, Homo sapiens	Bacteremia	collected_by:Dept of Microbiology, CMC Vellore	Good
BP10616	2020-03-24T00:00:00Z	PRJNA613369	SAMN14402350	JAAQTA010000001,JAAQTA010000010,JAAQTA010000011,JAAQTA010000012,JAAQTA010000013,JAAQTA010000014,JAAQTA010000015	Christian Medical College	Illumina HiSeq X10	98.82148x	SPAdes v. 3.12.0		89	5642532	57.0564	5660	blood	2019	India	India	Human, Homo sapiens	Bacteremia	collected_by:Dept of Microbiology, CMC Vellore	Good
BA17989	2020-03-24T00:00:00Z	PRJNA613369	SAMN14402347	JAAQSX010000001,JAAQSX010000010,JAAQSX010000011,JAAQSX010000012,JAAQSX010000013,JAAQSX010000014,JAAQSX010000015	Christian Medical College	Illumina HiSeq X10	103.625x	SPAdes v. 3.12.0		90	5469477	57.1068	5388	blood	2019	India	India	Human, Homo sapiens	Bacteremia	collected_by:Dept of Microbiology, CMC Vellore	Good
BA6008	2020-03-24T00:00:00Z	PRJNA613369	SAMN14402340	JAAQSQ010000001,JAAQSQ010000010,JAAQSQ010000011,JAAQSQ010000012,JAAQSQ010000013,JAAQSQ010000014,JAAQSQ010000015	Christian Medical College	Illumina HiSeq X10	90.67582x	SPAdes v. 3.12.0		78	5389306	57.2024	5291	blood	2019	India	India	Human, Homo sapiens	Bacteremia	collected_by:Dept of Microbiology, CMC Vellore	Good
BP1722	2020-03-24T00:00:00Z	PRJNA613369	SAMN14402338	JAAQSP010000001,JAAQSP010000010,JAAQSP010000011,JAAQSP010000012,JAAQSP010000013,JAAQSP010000014,JAAQSP010000015	Christian Medical College	Illumina HiSeq X10	60.48147x	SPAdes v. 3.12.0		79	5614090	57.1322	5607	blood	2019	India	India	Human, Homo sapiens	Bacteremia	collected_by:Dept of Microbiology, CMC Vellore	Good
BA9344	2020-03-24T00:00:00Z	PRJNA613369	SAMN14402334	JAAQSM010000001,JAAQSM010000010,JAAQSM010000011,JAAQSM010000012,JAAQSM010000013,JAAQSM010000014,JAAQSM010000015	Christian Medical College	Illumina HiSeq X10	91.70427x	SPAdes v. 3.12.0		85	5485218	57.1012	5400	blood	2019	India	India	Human, Homo sapiens	Bacteremia	collected_by:Dept of Microbiology, CMC Vellore	Good
BP3636	2020-03-24T00:00:00Z	PRJNA613369	SAMN14402341	JAAQSR010000001,JAAQSR010000010,JAAQSR010000100,JAAQSR010000011,JAAQSR010000012,JAAQSR010000013,JAAQSR010000014	Christian Medical College	Illumina HiSeq X10	101.1852x	SPAdes v. 3.12.0		100	5709977	56.8174	5585	blood	2019	India	India	Human, Homo sapiens	Bacteremia	collected_by:Dept of Microbiology, CMC Vellore	Good
BA6464	2020-03-24T00:00:00Z	PRJNA613369	SAMN14402335	JAAQSN010000001,JAAQSN010000010,JAAQSN010000100,JAAQSN010000101,JAAQSN010000102,JAAQSN010000103,JAAQSN010000104	Christian Medical College	Illumina HiSeq X10	60.86399x	SPAdes v. 3.12.0		112	5716999	56.9796	5740	blood	2019	India	India	Human, Homo sapiens	Bacteremia	collected_by:Dept of Microbiology, CMC Vellore	Good
BA2105	2020-03-24T00:00:00Z	PRJNA613369	SAMN14402336	JAAQSO010000001,JAAQSO010000010,JAAQSO010000011,JAAQSO010000012,JAAQSO010000013,JAAQSO010000014,JAAQSO010000015	Christian Medical College	Illumina HiSeq X10	69.67297x	SPAdes v. 3.12.0		99	5700049	56.756	5774	blood	2019	India	India	Human, Homo sapiens	Bacteremia	collected_by:Dept of Microbiology, CMC Vellore	Good
BA12818	2020-03-24T00:00:00Z	PRJNA613369	SAMN14402333	JAAQSL010000001,JAAQSL010000010,JAAQSL010000011,JAAQSL010000012,JAAQSL010000013,JAAQSL010000014,JAAQSL010000015	Christian Medical College	Illumina HiSeq X10	118.0515x	SPAdes v. 3.12.0		78	5388522	57.419	5354	blood	2019	India	India	Human, Homo sapiens	Bacteremia	collected_by:Dept of Microbiology, CMC Vellore	Good
BP5065	2020-03-24T00:00:00Z	PRJNA613369	SAMN14402343	JAAQST010000001,JAAQST010000010,JAAQST010000011,JAAQST010000012,JAAQST010000013,JAAQST010000014,JAAQST010000015	Christian Medical College	Illumina HiSeq X10	119.8965x	SPAdes v. 3.12.0		86	5635760	57.1219	5630	blood	2019	India	India	Human, Homo sapiens	Bacteremia	collected_by:Dept of Microbiology, CMC Vellore	Good
BA10835	2020-03-24T00:00:00Z	PRJNA613369	SAMN14402356	JAAQTG010000001,JAAQTG010000010,JAAQTG010000100,JAAQTG010000101,JAAQTG010000102,JAAQTG010000103,JAAQTG010000104	Christian Medical College	Illumina HiSeq X10	74.88745x	SPAdes v. 3.12.0		127	5881429	56.6974	5780	blood	2019	India	India	Human, Homo sapiens	Bacteremia	collected_by:Dept of Microbiology, CMC Vellore	Good
BA3635	2020-03-24T00:00:00Z	PRJNA613369	SAMN14402354	JAAQTE010000001,JAAQTE010000010,JAAQTE010000100,JAAQTE010000101,JAAQTE010000011,JAAQTE010000012,JAAQTE010000013	Christian Medical College	Illumina HiSeq X10	98.06272x	SPAdes v. 3.12.0		101	5492049	57.1037	5413	blood	2019	India	India	Human, Homo sapiens	Bacteremia	collected_by:Dept of Microbiology, CMC Vellore	Good
BA24670	2020-03-24T00:00:00Z	PRJNA613369	SAMN14402351	JAAQTB010000001,JAAQTB010000010,JAAQTB010000100,JAAQTB010000011,JAAQTB010000012,JAAQTB010000013,JAAQTB010000014	Christian Medical College	Illumina HiSeq X10	48.34932x	SPAdes v. 3.12.0		100	5507315	57.1313	5501	blood	2019	India	India	Human, Homo sapiens	Bacteremia	collected_by:Dept of Microbiology, CMC Vellore	Good
BA6378	2020-03-24T00:00:00Z	PRJNA613369	SAMN14402355	JAAQTF010000001,JAAQTF010000010,JAAQTF010000100,JAAQTF010000101,JAAQTF010000011,JAAQTF010000012,JAAQTF010000013	Christian Medical College	Illumina HiSeq X10	78.38121x	SPAdes v. 3.12.0		101	5446945	57.1979	5411	blood	2019	India	India	Human, Homo sapiens	Bacteremia	collected_by:Dept of Microbiology, CMC Vellore	Good
BA18015	2020-03-24T00:00:00Z	PRJNA613369	SAMN14402348	JAAQSY010000001,JAAQSY010000010,JAAQSY010000011,JAAQSY010000012,JAAQSY010000013,JAAQSY010000014,JAAQSY010000015	Christian Medical College	Illumina HiSeq X10	43.38516x	SPAdes v. 3.12.0		69	5415830	57.2945	5251	blood	2019	India	India	Human, Homo sapiens	Bacteremia	collected_by:Dept of Microbiology, CMC Vellore	Good
BA12949	2020-03-24T00:00:00Z	PRJNA613369	SAMN14402345	JAAQSV010000001,JAAQSV010000010,JAAQSV010000100,JAAQSV010000101,JAAQSV010000102,JAAQSV010000103,JAAQSV010000104	Christian Medical College	Illumina HiSeq X10	85.97001x	SPAdes v. 3.12.0		115	5736970	56.9537	5766	blood	2019	India	India	Human, Homo sapiens	Bacteremia	collected_by:Dept of Microbiology, CMC Vellore	Good
BA18029	2020-03-24T00:00:00Z	PRJNA613369	SAMN14402331	JAAQSJ010000001,JAAQSJ010000010,JAAQSJ010000100,JAAQSJ010000101,JAAQSJ010000102,JAAQSJ010000103,JAAQSJ010000104	Christian Medical College	Illumina HiSeq X10	102.0711x	SPAdes v. 3.12.0		106	5611976	57.0962	5581	blood	2019	India	India	Human, Homo sapiens	Bacteremia	collected_by:Dept of Microbiology, CMC Vellore	Good
BA17341	2020-03-24T00:00:00Z	PRJNA613369	SAMN14402332	JAAQSK010000001,JAAQSK010000010,JAAQSK010000011,JAAQSK010000012,JAAQSK010000013,JAAQSK010000014,JAAQSK010000015	Christian Medical College	Illumina HiSeq X10	80.86245x	SPAdes v. 3.12.0		97	5434452	57.2022	5349	blood	2019	India	India	Human, Homo sapiens	Bacteremia	collected_by:Dept of Microbiology, CMC Vellore	Good
BP11474	2020-03-24T00:00:00Z	PRJNA613369	SAMN14402330	JAAQSI010000001,JAAQSI010000010,JAAQSI010000011,JAAQSI010000012,JAAQSI010000013,JAAQSI010000014,JAAQSI010000015	Christian Medical College	Illumina HiSeq X10	96.52407x	SPAdes v. 3.12.0		79	5634154	57.1258	5625	blood	2019	India	India	Human, Homo sapiens	Bacteremia	collected_by:Dept of Microbiology, CMC Vellore	Good
BA27935	2020-03-24T00:00:00Z	PRJNA613369	SAMN14402329	JAAQSH010000001,JAAQSH010000010,JAAQSH010000100,JAAQSH010000101,JAAQSH010000102,JAAQSH010000103,JAAQSH010000011	Christian Medical College	Illumina HiSeq X10	92.34004x	SPAdes v. 3.12.0		103	5798512	56.7302	5689	blood	2019	India	India	Human, Homo sapiens	Bacteremia	collected_by:Dept of Microbiology, CMC Vellore	Good
BA11905	2020-03-24T00:00:00Z	PRJNA613369	SAMN14402344	JAAQSU010000001,JAAQSU010000010,JAAQSU010000011,JAAQSU010000012,JAAQSU010000013,JAAQSU010000014,JAAQSU010000015	Christian Medical College	Illumina HiSeq X10	124.7391x	SPAdes v. 3.12.0		92	5436739	57.2186	5335	blood	2019	India	India	Human, Homo sapiens	Bacteremia	collected_by:Dept of Microbiology, CMC Vellore	Good
BA28118	2020-03-24T00:00:00Z	PRJNA613369	SAMN14402327	JAAQSG010000001,JAAQSG010000010,JAAQSG010000011,JAAQSG010000012,JAAQSG010000013,JAAQSG010000014,JAAQSG010000015	Christian Medical College	Illumina HiSeq X10	86.42289x	SPAdes v. 3.12.0		89	5648068	56.9133	5519	blood	2019	India	India	Human, Homo sapiens	Bacteremia	collected_by:Dept of Microbiology, CMC Vellore	Good
BP19451	2020-03-24T00:00:00Z	PRJNA613369	SAMN14402360	JAAQTJ010000001,JAAQTJ010000010,JAAQTJ010000100,JAAQTJ010000101,JAAQTJ010000102,JAAQTJ010000103,JAAQTJ010000104	Christian Medical College	Illumina HiSeq X10	90.76295x	SPAdes v. 3.12.0		127	5762743	57.0254	5831	blood	2019	India	India	Human, Homo sapiens	Bacteremia	collected_by:Dept of Microbiology, CMC Vellore	Good
BA36749	2020-03-24T00:00:00Z	PRJNA613369	SAMN14402357	JAAQTH010000001,JAAQTH010000010,JAAQTH010000011,JAAQTH010000012,JAAQTH010000013,JAAQTH010000014,JAAQTH010000015	Christian Medical College	Illumina HiSeq X10	108.5356x	SPAdes v. 3.12.0		85	5461127	57.227	5385	blood	2019	India	India	Human, Homo sapiens	Bacteremia	collected_by:Dept of Microbiology, CMC Vellore	Good
BA4393	2020-03-26T00:00:00Z	PRJNA613369	SAMN14402339	JAARMI010000001,JAARMI010000010,JAARMI010000100,JAARMI010000101,JAARMI010000102,JAARMI010000103,JAARMI010000104	Christian Medical College	Illumina HiSeq X10	86.27232x	SPAdes v. 3.12.0		165	5775872	56.823	5711	blood	2019	India	India	Human, Homo sapiens	Bacteremia	collected_by:Dept of Microbiology, CMC Vellore	Good
BA1602	2020-03-26T00:00:00Z	PRJNA613369	SAMN14402337	JAARMH010000001,JAARMH010000010,JAARMH010000100,JAARMH010000101,JAARMH010000102,JAARMH010000011,JAARMH010000012	Christian Medical College	Illumina HiSeq X10	65.01765x	SPAdes v. 3.12.0		102	5723342	56.8092	5602	blood	2019	India	India	Human, Homo sapiens	Bacteremia	collected_by:Dept of Microbiology, CMC Vellore	Good
BA28088	2020-03-26T00:00:00Z	PRJNA613369	SAMN14402328	JAARMG010000001,JAARMG010000010,JAARMG010000011,JAARMG010000012,JAARMG010000013,JAARMG010000014,JAARMG010000015	Christian Medical College	Illumina HiSeq X10	39.12011x	SPAdes v. 3.12.0		77	5553866	57.1587	5547	blood	2019	India	India	Human, Homo sapiens	Bacteremia	collected_by:Dept of Microbiology, CMC Vellore	Good
MRK9	2020-01-28T00:00:00Z	PRJNA513450	SAMN10712994	CP043859,CP043860,CP043861,CP043862,CP043863,CP043864	ICMR- National Institute of Pathology and VVMC Safdarjung Hospital Campus, New Delhi -110029	Illumina HiSeq	48.1x	SPAdes v. 3.13.0	5	6	5940676	56.9293	5906	urine	2018-01-23	India	India: Safdarjung Hospital, New Delhi	Human, Homo sapiens	Nosocomical Infection	collected_by:Mudsser Azam	Good
BA32040	2020-07-14T00:00:00Z	PRJNA613369	SAMN14419361	JAARNO010000001,JAARNO010000002,JAARNO010000003,JAARNO010000004,JAARNO010000005	Christian Medical College	Illumina HiSeq	114.7143x	SPAdes v. 3.12.0		5	5773459	56.7551	5456	blood	2019	India	India	Human, Homo sapiens	Bacteremia	collected_by:Dept of microbiology, CMC, Vellore, India	Good
ME30	2020-07-28T00:00:00Z	PRJEB37902	SAMEA7026324	CAJCKY010000001,CAJCKY010000002,CAJCKY010000003,CAJCKY010000004,CAJCKY010000005,CAJCKY010000006,CAJCKY010000007	CARDIFF SCHOOL OF BIOSCIENCES					127	5522302	56.9471		Garcinia xanthochymus leaf	2017-07-05/2017-08-28	India	India	Garcinia xanthochymus			Good
PVN-1	1900-01-01T00:00:00Z	PRJNA658226	SAMN15862288	JACORD010000001,JACORD010000010,JACORD010000011,JACORD010000012,JACORD010000013,JACORD010000014,JACORD010000015	CSIR- National Environmental Engineering Research Institute	Illumina NextSeq	88.0x	SPAdes v. 3.13.0		19	5064337	57.5736	4856	STP sludge	2017-04-21	India	India			sample_type:Whole organism	Good
BA31746	2020-09-21T00:00:00Z	PRJNA663236	SAMN16124447	JACWMP010000042,JACWMP010000038,JACWMP010000024,JACWMP010000001,JACWMP010000010,JACWMP010000011,JACWMP010000012	Christian Medical College	Illumina HiSeq	41.0x	SPAdes v. March 2020	3	60	5418178	57.2954	5161	blood	2019	India	India	Human, Homo sapiens	Bacteremia	collected_by:Department of Clinical Microbiology, Christian Medical College, Vellore	Good
BA24831	2020-09-21T00:00:00Z	PRJNA663236	SAMN16124401	JACWMO010000031,JACWMO010000015,JACWMO010000001,JACWMO010000010,JACWMO010000011,JACWMO010000012,JACWMO010000013	Christian Medical College	Illumina HiSeq	78.5x	SPAdes v. March 2020	2	53	5576660	57.2905	5365	blood	2019	India	India	Human, Homo sapiens	Bacteremia	collected_by:Department of Clinical Microbiology, Christian Medical College, Vellore	Good
BA23183	2020-09-21T00:00:00Z	PRJNA663236	SAMN16124512	JACWMR010000047,JACWMR010000044,JACWMR010000039,JACWMR010000022,JACWMR010000052,JACWMR010000036,JACWMR010000001	Christian Medical College	Illumina HiSeq	84.0x	SPAdes v. March 2020	6	107	5610341	57.0945	5462	blood	2019	India	India	Human, Homo sapiens	Bacteremia	collected_by:Department of Clinical Microbiology, Christian Medical College, Vellore	Good
BA4072	2020-09-21T00:00:00Z	PRJNA663236	SAMN16124449	JACWMQ010000019,JACWMQ010000001,JACWMQ010000010,JACWMQ010000011,JACWMQ010000012,JACWMQ010000013,JACWMQ010000014	Christian Medical College	Illumina HiSeq	113.0x	SPAdes v. March 2020	1	46	5441213	57.3362	5195	blood	2019	India	India	Human, Homo sapiens	Bacteremia	collected_by:Department of Clinical Microbiology, Christian Medical College, Vellore	Good
B6753	2020-10-31T00:00:00Z	PRJNA668026	SAMN16393502	JADDTT010000017,JADDTT010000044,JADDTT010000055,JADDTT010000032,JADDTT010000001,JADDTT010000010,JADDTT010000100	Christian Medical College	Illumina HiSeq	199.7x	SPAdes v. August 2020	4	103	5642939	56.9189	5487	blood	2019	India	India	Human, Homo sapiens	Bacteremia	collected_by:Department of Clinical Microbiology, Christian Medical College, Vellore	Good
IR27	2020-12-06T00:00:00Z	PRJNA681078	SAMN16931598	JADWPG010000001,JADWPG010000010,JADWPG010000011,JADWPG010000012,JADWPG010000013,JADWPG010000002,JADWPG010000003	Sri Sathya Sai Institute of Higher Learning	Illumina HiSeq; Oxford Nanopore MinION	91.49x	Unicycler v. 0.4.8		13	5599410	57.0537	5394	mid-stream urine	2016-04-23	India	India: Puttaparthi	Human, Homo sapiens	Urinary Tract Infection	collected_by:Sri Sathya Sai Institute of Higher Medical Sciences, Prasanthigram	Good
H53	1900-01-01T00:00:00Z	PRJNA685993	SAMN17103367	JAENDG010000001,JAENDG010000002,JAENDG010000003,JAENDG010000004,JAENDG010000005,JAENDG010000006,JAENDG010000007	Translational Health Science and Technology Institute	Illumina MiSeq	30.0x	GS De Novo Assembler v. 3.0		82	5607032	56.9735	5459	blood	2020-08-27	India	India	Human, Homo sapiens			Good
H62	1900-01-01T00:00:00Z	PRJNA685995	SAMN17103397	JAENDH010000001,JAENDH010000002,JAENDH010000003,JAENDH010000004,JAENDH010000005,JAENDH010000006,JAENDH010000007	Translational Health Science and Technology Institute	Illumina MiSeq	30.0x	GS De Novo Assembler v. 3.0		69	5617821	56.9544	5462	blood	2020-08-27	India	India	Human, Homo sapiens	Sepsis	collected_by:AIIMS	Good
AWD5	2016-11-10T00:00:00Z	PRJNA326255	SAMN05272522	MOXK00000000	Assam University, Silchar	Illumina HiSeq	50.0x	Bowtie v. 15.0.3 Pro Edition		137	4807409	58.17	4704	Soil	2015-10-12	India	India			sample_type:Rhizosphere soil	Good
PM1168	2016-11-16T00:00:00Z	PRJNA343693	SAMN05792399	MNPA00000000	Christian Medical College	IonTorrent	32.0x	SPAdes v. 5.0.0.0	3	216	5528298	57.12	5413	Blood	2016	India	India: New Delhi	Human, Homo sapiens	Blood stream infection	collected_by:AIIMS	Good
PM1134	2016-11-16T00:00:00Z	PRJNA343703	SAMN05792418	MNPF00000000	Christian Medical College	IonTorrent	40.0x	SPAdes v. 5.0.0.0	5	303	5720251	56.87	5593	Blood	2016	India	India: New Delhi	Human, Homo sapiens	Blood stream infection	collected_by:AIIMS	Good
PM5186	2016-11-16T00:00:00Z	PRJNA343699	SAMN05792415	MNPE00000000	Christian Medical College	IonTorrent	41.0x	SPAdes v. 5.0.0.0	3	284	5416179	57.15	5299	pus	2014	India	India: New Delhi	Human, Homo sapiens	Bacteremia	collected_by:AIIMS	Good
PM1995	2016-11-16T00:00:00Z	PRJNA343698	SAMN05792413	MNPD00000000	Christian Medical College	IonTorrent	51.0x	SPAdes v. 5.0.0.0	4	149	5575695	56.94	5557	Blood	2016	India	India: New Delhi	Human, Homo sapiens	Blood stream infection	collected_by:AIIMS	Good
PM1842	2016-11-16T00:00:00Z	PRJNA343697	SAMN05792410	MNPC00000000	Christian Medical College	IonTorrent	43.0x	SPAdes v. 5.0.0.0	5	150	5572312	56.95	5559	Urine	2016	India	India: New Delhi	Human, Homo sapiens	Blood stream infection	collected_by:AIIMS	Good
PM565	2016-11-16T00:00:00Z	PRJNA343694	SAMN05792405	MNPB00000000	Christian Medical College	IonTorrent	40.0x	SPAdes v. 5.0.0.0	5	158	5642930	56.95	5624	Blood	2016	India	India: New Delhi	Human, Homo sapiens	Blood stream infection	collected_by:AIIMS	Good
PM138	2016-11-16T00:00:00Z	PRJNA343705	SAMN05792428	MNPG00000000	Christian Medical College	IonTorrent	38.0x	SPAdes v. 5.0.0.0	5	509	5753338	56.91	5793	bronchoalveolar lavage	2016	India	India: New Delhi	Human, Homo sapiens	Infection	collected_by:AIIMS	Good
PM716	2016-11-16T00:00:00Z	PRJNA343707	SAMN05792433	MNPH00000000	Christian Medical College	IonTorrent	43.0x	SPAdes v. 5.0.0.0	5	224	5707987	56.86	5581	Blood	2016	India	India: New Delhi	Human, Homo sapiens	Blood stream infection	collected_by:AIIMS	Good
CMC_VB34444	2016-12-08T00:00:00Z	PRJNA342018	SAMN05732393	MPCT00000000	Christian Medical College	IonTorrent	52.0x	SPADES v. 5.0.0.0	5	211	5851903	56.71	5715	Blood	2013	India	India	Human, Homo sapiens	Bacteremia	collected_by:Christian Medical College	Good
B16470	2016-12-12T00:00:00Z	PRJNA341827	SAMN05729271	MIEJ00000000	Christian Medical College	Ion torrent	37.14x	SPAdes v. 5.0	5	204	5776419	56.73	5631	blood	2014	India	India	Human, Homo sapiens	Bacterimia	collected_by:Christian Medical College	Good
JNM8C2	2018-08-09T00:00:00Z	PRJNA479753	SAMN09604002	CP030857,CP030858,CP030859	National Institute of Biomedical Genomics	Illumina HiSeq	249.0x	Bowtie v. 2; Velvet v. 1.2.10	2	3	6078389	57.1025	5538	Nasal swab	2017	India	India: West Bengal	Human, Homo sapiens	Respiratory distress	collected_by:College of Medicine & JNM Hospital, Kalyani, India	Good
